# Supplementary material for: High Expression of EpCAM and Sox2 is a Positive Prognosticator of Clinical Outcome for Head and Neck Carcinoma
Source: Springer Nature journal article supplement (doi:10.1038/s41598-018-32178-8), 2018-09-25
Supplement: MOESM1 [file 41598_2018_32178_MOESM1_ESM.pdf]

## **High Expression of EpCAM and Sox2 is a Positive Prognosticator of Clinical Outcome for Head and Neck Carcinoma**

*Philipp Baumeister*<sup>1,2\*</sup>, *Alessandra Hollmann*<sup>1\*</sup>, *Julia Kitz*<sup>3\*</sup>, *Artemis Afthonidou*<sup>1</sup>, *Florian Simon*<sup>1</sup>, *Julius Shakhtour*<sup>1</sup>, *Brigitte Mack*<sup>1</sup>, *Gisela Kranz*<sup>1</sup>, *Darko Libl*<sup>1</sup>, *Martin Leu*<sup>4</sup>, *Markus A. Schirmer*<sup>4</sup>, *Martin Canis*<sup>1</sup>, *Claus Belka*<sup>2,5</sup>, *Horst Zitzelsberger*<sup>2,6</sup>, *Ute Ganswindt*<sup>2,5</sup>, *Julia Hess*<sup>2,6</sup>, *Mark Jakob*<sup>1,§</sup>, *Kristian Unger*<sup>2,6,§</sup>, and *Olivier Gires*<sup>1,2,§</sup>

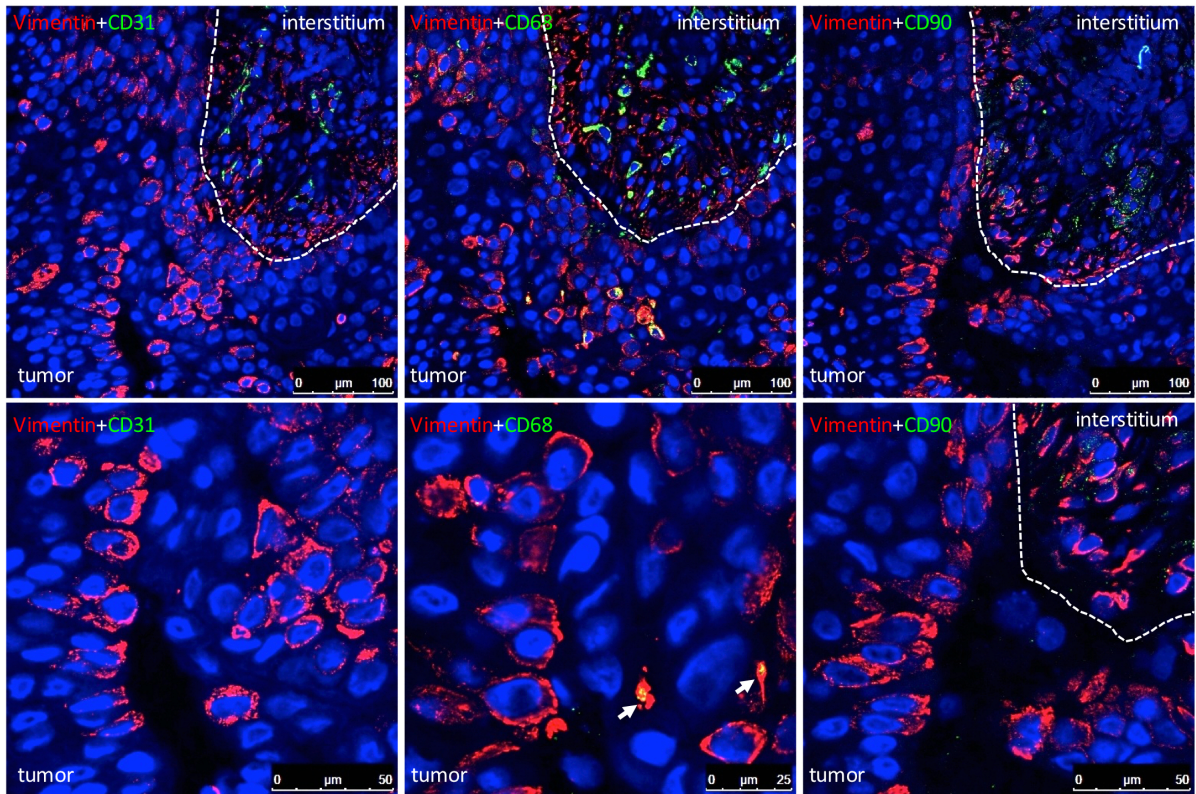

**Supplementary Figure 1 - Detection of CD31, CD68 and CD90 in HNSCC.**

CD31 (endothelial cells, monocytes, neutrophils), CD68 (monocytes, macrophages) and CD90 (fibroblasts, stem cells, thymocytes) expression was analyzed in simultaneous immunofluorescence staining with vimentin one HNSCC specimen. All markers were depicted as red staining except for vimentin (green). Nuclear DNA is stained in blue with DAPI. The margin between tumor and interstitium are marked as dotted lines. Vimentin<sup>+</sup>/CD68<sup>+</sup> cells are marked with white arrows. Lower panels show higher magnification of selected areas.

**Supplementary Table 1:** IHC scores of EpEX, Sox2, and vimentin expression in HNSCC primary tumors of the LMU cohort (n=94). Scores have been evaluated by 3 (EpEX and Sox2) and 2 (vimentin) experimenters and are shown as single and mean values. Data on gender, age, smoking behavior, p16 expression as a surrogate for HPV status, HNSCC tumor localization as well as T and N status for the study participants of the LMU cohort are listed beneath.

| Patient | EpEx IHC score 1 | EpEx % x int.          | EpEx IHC score 2 | EpEx % x int.          | EpEX IHC score 3 | EpEx % x int.          | Mean EpEx IHC score |
|---------|------------------|------------------------|------------------|------------------------|------------------|------------------------|---------------------|
| 1       | 300              | 100*3                  | 270              | 90*3 10*0              | 300              | 100*3                  | 290.0               |
| 2       | 130              | 20*3 20*2<br>30*1 30*0 | 240              | 70*3 10*2<br>10*1 10*0 | 150              | 30*3 20*2<br>20*1 30*0 | 173.3               |
| 3       | 0                | 100*0                  | 0                | 100*0                  | 0                | 100*0                  | 0.0                 |
| 4       | 180              | 10*3 70*2<br>10*1 10*0 | 190              | 10*3 80*2<br>10*0      | 120              | 40*2 40*1<br>20*0      | 163.3               |
| 5       | 280              | 90*3 10*1              | 280              | 80*3 20*2              | 250              | 50*3 50*2              | 270.0               |
| 6       | 290              | 90*3 10*2              | 150              | 50*2 50*1              | 300              | 100*3                  | 246.7               |
| 7       | 280              | 90*3 5*2<br>5*0        | 300              | 100*3                  | 300              | 100*3                  | 293.3               |
| 8       | 280              | 80*3 20*2              | 250              | 70*3 20*2<br>10*0      | 280              | 80*3 20*2              | 270.0               |
| 9       | 170              | 20*3 30*2<br>50*1      |                  |                        | 230              | 50*3 30*2<br>20*1      | 200.0               |
| 10      | 110              | 30*3 10*2<br>60*0      | 140              | 40*3 10*2<br>50*0      | 150              | 40*3 10*2<br>10*1 40*0 | 133.3               |
| 11      | 180              | 20*3 40*2<br>40*1      |                  |                        | 180              | 20*3 50*2<br>20*1 10*0 | 180.0               |
| 12      | 190              | 20*3 60*2<br>10*1 10*0 | 110              | 40*2 30*1<br>30*0      | 220              | 50*3 20*2<br>30*1      | 173.3               |
| 13      | 290              | 90*3 10*2              |                  |                        | 270              | 70*3 30*2              | 280.0               |
| 14      | 230              | 60*3 10*2<br>30*1      | 240              | 80*3 20*0              | 240              | 80*3 20*0              | 236.7               |
| 15      | 230              | 50*3 30*2<br>20*1      |                  |                        | 210              | 50*3 20*2<br>20*1 10*0 | 220.0               |
| 16      | 170              | 30*3 20*2<br>40*1 10*0 |                  |                        | 230              | 50*3 30*2<br>20*1      | 200.0               |
| 17      | 240              | 60*3 20*2<br>20*1      | 220              | 70*3 10*1<br>20*0      | 250              | 80*3 10*1<br>10*0      | 236.7               |
| 18      | 160              | 20*3 50*2<br>30*0      | 170              | 70*2 30*1              | 115              | 10*3 30*2<br>25*1 35*0 | 148.3               |
| 19      | 270              | 80*3 10*2<br>10*1      | 280              | 80*3 20*2              | 280              | 90*3 10*1              | 276.7               |
| 20      | 180              | 30*3 30*2<br>30*1 10*0 |                  |                        | 210              | 30*3 50*2<br>20*1      | 195.0               |
| 21      | 230              | 70*3 20*1<br>10*0      | 280              | 80*3 20*2              | 220              | 60*3 20*2<br>20*0      | 243.3               |
| 22      | 160              | 20*3 30*2<br>40*1 10*0 |                  |                        | 210              | 50*3 20*2<br>20*1 10*0 | 185.0               |
| 23      | 150              | 20*3 30*2<br>30*1 20*0 | 230              | 30*3 70*2              | 250              | 50*3 50*2              | 210.0               |
| 24      | 150              | 50*3 50*0              |                  |                        | 170              | 40*3 20*2<br>10*1 30*0 | 160.0               |
| 25      | 260              | 70*3 20*2<br>10*1      |                  |                        | 290              | 90*3 10*2              | 275.0               |
| 26      | 190              | 40*3 30*2<br>10*1 10*0 | 260              | 80*3 20*1              | 280              | 80*3 20*2              | 243.3               |
| 27      | 230              | 70*3 20*1<br>10*0      | 200              | 100*2                  | 250              | 50*3 50*2              | 226.7               |

|    |     |                        |     |                        |     |                        |       |
|----|-----|------------------------|-----|------------------------|-----|------------------------|-------|
| 28 | 280 | 90*3 10*1              | 300 | 100*3                  | 300 | 100*3                  | 293.3 |
| 29 | 260 | 70*3 20*2<br>10*1      | 290 | 90*3 10*2              | 300 | 100*3                  | 283.3 |
| 30 | 110 | 20*2 70*1<br>10*0      | 100 | 100*1                  | 130 | 40*2 50*1<br>10*0      | 113.3 |
| 31 | 140 | 30*3 20*2<br>10*1 60*0 | 180 | 40*3 30*2<br>30*0      | 190 | 50*3 20*2<br>30*0      | 170.0 |
| 32 | 280 | 80*3 20*2              |     |                        | 230 | 60*3 15*2*<br>20*1 5*0 | 255.0 |
| 33 | 15  | 5*3 95*0               | 70  | 30*2 10*1<br>60*0      | 80  | 30*2 20*1<br>50*0      | 55.0  |
| 34 | 220 | 60*3 10*2<br>20*1 10*0 | 230 | 60*3 20*2<br>10*1 10*0 | 250 | 60*3 30*2<br>10*0      | 233.3 |
| 35 | 70  | 20*3 10*1<br>70*0      |     |                        | 280 | 80*3 20*2              | 175.0 |
| 36 | 290 | 90*3 10*2              | 280 | 80*3 20*2              | 300 | 100*3                  | 290.0 |
| 37 | 6   | 2*3 98*0               |     |                        | 0   | 100*0                  | 3.0   |
| 38 | 265 | 80*3 10*2<br>5*1 5*0   | 280 | 80*3 20*2              | 290 | 90*3 10*2              | 278.3 |
| 39 | 15  | 5*3 95*0               |     |                        | 35  | 5*3 10*2<br>85*0       | 25.0  |
| 40 | 270 | 70*3 30*2              |     |                        | 200 | 30*3 40*2<br>30*1      | 235.0 |
| 41 | 230 | 70*3 20*1<br>10*0      | 250 | 80*3 10*1<br>10*0      | 220 | 60*3 10*2<br>20*1 10*0 | 233.3 |
| 42 | 0   | 100*0                  |     |                        | 5   | 5*1 95*0               | 2.5   |
| 43 | 170 | 20*3 50*2<br>10*1 20*0 | 255 | 70*3 20*2<br>5*1 5*0   | 230 | 60*3 20*2<br>10*1 10*0 | 218.3 |
| 44 | 40  | 5*3 25*1<br>70*0       | 20  | 20*1 80*0              | 70  | 5*3 20*2<br>15*1 60*0  | 43.3  |
| 45 | 260 | 70*3 20*2<br>10*1      |     |                        | 290 | 90*3 10*2              | 275.0 |
| 46 | 110 | 30*3 10*2<br>60*0      | 150 | 30*3 30*2<br>40*0      | 140 | 40*3 20*1<br>40*0      | 133.3 |
| 47 | 130 | 40*3 10*1<br>50*0      |     |                        | 220 | 70*3 10*1<br>20*0      | 175.0 |
| 48 | 170 | 30*3 30*2<br>20*1 20*0 | 240 | 70*3 10*2<br>10*1 10*0 | 260 | 60*3 40*2              | 223.3 |
| 49 | 70  | 10*3 10*2<br>20*1 60*0 | 140 | 30*3 20*2<br>10*1 40*0 | 120 | 50*2 20*1<br>30*0      | 110.0 |
| 50 | 300 | 100*3                  | 300 | 100*3                  | 300 | 100*3                  | 300.0 |
| 51 |     |                        |     |                        |     |                        |       |
| 52 | 80  | 10*2 60*1<br>30*0      | 40  | 20*2 80*0              | 80  | 10*2 60*1<br>30*0      | 66.7  |
| 53 | 280 | 90*3 10*1              | 300 | 100*3                  | 300 | 100*3                  | 293.3 |
| 54 | 300 | 100*3                  | 210 | 10*3 90*2              | 300 | 100*3                  | 270.0 |
| 55 | 240 | 70*3 10*2<br>10*1 10*0 |     |                        | 260 | 80*3 20*1              | 250.0 |
| 56 | 210 | 50*3 30*2<br>20*0      | 290 | 90*3 10*2              | 270 | 70*3 30*2              | 256.7 |
| 57 | 180 | 30*3 30*2<br>30*1 10*0 |     |                        | 210 | 30*3 50*2<br>20*1      | 195.0 |
| 58 | 160 | 30*3 20*2<br>30*1 20*0 | 250 | 70*3 20*2<br>10*0      | 180 | 40*3 20*2<br>20*1 20*0 | 196.7 |
| 59 | 200 | 30*3 40*2<br>30*1      | 190 | 10*3 80*2<br>10*0      | 260 | 70*3 20*2<br>10*1      | 216.7 |
| 60 | 60  | 10*3 30*1              | 30  | 5*2 20*1               | 80  | 30*2 20*1              | 56.7  |

|           |     |                        |     |                        |     |                        |       |
|-----------|-----|------------------------|-----|------------------------|-----|------------------------|-------|
|           |     | 60*0                   |     | 75*0                   |     | 50*0                   |       |
| <b>61</b> | 185 | 20*3 50*2<br>25*1 5*0  | 170 | 10*3 70*2<br>20*0      | 250 | 60*3 30*2<br>10*1      | 201.7 |
| <b>62</b> | 300 | 100*3                  | 270 | 90*3 10*0              | 280 | 80*3 20*2              | 283.3 |
| <b>63</b> | 190 | 40*3 30*2<br>10*1 20*0 | 150 | 50*3 50*0              | 250 | 80*3 10*1<br>10*0      | 196.7 |
| <b>64</b> | 170 | 30*3 20*2<br>40*1 10*0 | 110 | 30*3 10*2<br>60*0      | 160 | 40*3 20*2<br>40*0      | 146.7 |
| <b>65</b> | 260 | 60*3 40*2              |     |                        | 220 | 30*3 65*2<br>5*0       | 240.0 |
| <b>66</b> | 200 | 30*3 40*2<br>30*1      | 250 | 50*3 50*2              | 200 | 30*3 40*2<br>30*1      | 216.7 |
| <b>67</b> | 300 | 100*3                  | 300 | 100*3                  | 300 | 100*3                  | 300.0 |
| <b>68</b> | 300 | 100*3                  | 300 | 100*3                  | 300 | 100*3                  | 300.0 |
| <b>69</b> | 5   | 5*1 95*0               | 30  | 30*1 70*0              | 30  | 10*2 10*1<br>80*0      | 21.7  |
| <b>70</b> | 5   | 5*1 95*0               | 0   | 100*0                  | 0   | 100*0                  | 1.7   |
| <b>71</b> | 260 | 70*3 20*2<br>10*1      | 280 | 80*3 20*2              | 280 | 80*3 20*2              | 273.3 |
| <b>72</b> | 150 | 10*3 40*2<br>40*1 10*0 |     |                        | 160 | 10*3 60*2<br>10*1 10*0 | 155.0 |
| <b>73</b> | 275 | 90*3 5*1<br>5*0        | 270 | 80*3 10*2<br>10*1      | 280 | 90*3 10*1              | 275.0 |
| <b>74</b> | 0   | 100*0                  | 15  | 5*3 95*0               | 20  | 20*1 80*0              | 11.7  |
| <b>75</b> | 290 | 90*3 10*2              |     |                        | 290 | 90*3 10*2              | 290.0 |
| <b>76</b> | 250 | 80*3 10*1<br>10*0      |     |                        | 240 | 70*3 10*2<br>10*1 10*0 | 245.0 |
| <b>77</b> | 260 | 80*3 20*1              | 270 | 80*3 10*2<br>10*1      | 300 | 100*3                  | 276.7 |
| <b>78</b> | 270 | 70*3 30*2              | 250 | 50*3 50*2              | 270 | 70*3 30*2              | 263.3 |
| <b>79</b> | 35  | 5*3 10*2<br>85*0       | 55  | 10*3 10*2<br>5*1 75*0  | 100 | 10*3 30*2<br>10*1 50*0 | 63.3  |
| <b>80</b> | 200 | 40*3 30*2<br>20*1 10*0 | 210 | 40*3 40*2<br>10*1 10*0 | 200 | 40*3 30*2<br>20*1 10*0 | 203.3 |
| <b>81</b> | 220 | 60*3 10*2<br>20*1 20*0 | 250 | 50*3 50*2              | 280 | 80*3 20*2              | 250.0 |
| <b>82</b> | 160 | 10*3 40*2<br>50*1      |     |                        | 180 | 30*3 40*2<br>10*1 20*0 | 170.0 |
| <b>83</b> | 80  | 10*3 25*2<br>65*0      |     |                        | 175 | 30*3 30*2<br>25*1 15*0 | 127.5 |
| <b>84</b> | 270 | 70*3 30*2              |     |                        | 250 | 60*3 30*2<br>10*1      | 260.0 |
| <b>85</b> | 285 | 90*3 5*2<br>5*1        | 285 | 95*3 5*0               | 300 | 100*3                  | 290.0 |
| <b>86</b> | 280 | 90*3 10*1              | 280 | 80*3 20*2              | 300 | 100*3                  | 286.7 |
| <b>87</b> | 235 | 60*3 20*2<br>15*1 5*0  | 120 | 60*2 40*0              | 245 | 70*3 10*2<br>15*1 5*0  | 200.0 |
| <b>88</b> | 200 | 50*3 20*2<br>10*1 20*0 | 280 | 80*3 20*2              | 210 | 50*3 20*2<br>20*1 10*0 | 230.0 |
| <b>89</b> | 100 | 10*3 10*2<br>50*1 30*0 | 50  | 50*1 50*0              | 90  | 10*3 20*2<br>20*1 50*0 | 80.0  |
| <b>90</b> | 170 | 40*3 10*2<br>30*1 20*0 | 290 | 90*3 10*2              | 230 | 50*3 30*2<br>20*1      | 230.0 |
| <b>91</b> | 150 | 20*3 30*2<br>30*1 20*0 |     |                        | 190 | 20*3 50*2<br>30*1      | 170.0 |
| <b>92</b> | 85  | 5*3 5*2<br>60*1 30*0   | 90  | 10*3 60*1<br>30*0      | 160 | 20*3 40*2<br>20*1 20*0 | 111.7 |

|    |     |           |     |           |     |           |       |
|----|-----|-----------|-----|-----------|-----|-----------|-------|
| 93 | 270 | 70*3 30*2 | 270 | 70*3 30*2 | 280 | 80*3 20*2 | 273.3 |
| 94 | 290 | 90*3 10*2 | 300 | 100*3     | 300 | 100*3     | 296.7 |

| Patient | Sox2 IHC score 1 | Sox2 % x int.          | Sox2 IHC score 2 | Sox2 % x int.          | Sox2 IHC score 3 | Sox2 % x int.          | Mean Sox2 IHC score |
|---------|------------------|------------------------|------------------|------------------------|------------------|------------------------|---------------------|
| 1       | 0                | 100*0                  | 0                | 100*0                  | 0                | 100*0                  | 0.0                 |
| 2       | 120              | 20*3 20*2<br>20*1 40*0 | 240              | 70*3 10*2<br>10*1 10*0 | 140              | 30*3 20*2<br>10*1 40*0 | 166.7               |
| 3       | 0                | 100*0                  | 10               | 10*1 90*0              | 90               | 40*2 10*1<br>50*0      | 33.3                |
| 4       | 0                | 100*0                  | 0                | 100*0                  | 0                | 100*0                  | 0.0                 |
| 5       | 30               | 30*1 70*0              | 5                | 5*1 95*0               | 20               | 20*1 80*0              | 18.3                |
| 6       | 240              | 80*3 20*0              | 150              | 50*2 50*1              | 70               | 10*3 20*2<br>70*0      | 153.3               |
| 7       | 185              | 10*3 70*2<br>15*1 5*0  | 100              | 20*3 20*2<br>60*0      | 170              | 40*3 20*2<br>10*1 30*0 | 151.7               |
| 8       | 10               | 10*1 90*0              | 10               | 10*1 90*0              | 30               | 10*2 10*1<br>80*0      | 16.7                |
| 9       | 0                | 100*0                  |                  |                        | 0                | 100*0                  | 0.0                 |
| 10      | 170              | 30*3 40*2<br>30*0      | 140              | 40*3 10*2<br>50*0      | 210              | 60*3 10*2<br>10*1 20*0 | 173.3               |
| 11      | 10               | 10*1 90*0              |                  |                        | 10               | 10*1 90*0              | 10.0                |
| 12      | 40               | 10*2 20*1<br>70*0      | 90               | 30*2 30*1<br>40*0      | 10               | 10*1 90*0              | 46.7                |
| 13      | 220              | 50*3 30*2<br>10*1 10*0 |                  |                        | 220              | 70*3 10*1<br>20*0      | 220.0               |
| 14      | 200              | 30*3 40*2<br>30*1      | 180              | 20*3 60*2<br>20*0      | 120              | 50*2 20*1<br>30*0      | 166.7               |
| 15      | 90               | 20*3 10*2<br>10*1 60*0 |                  |                        | 150              | 40*3 10*2<br>10*1 40*0 | 120.0               |
| 16      | 140              | 30*3 20*2<br>10*1 40*0 |                  |                        | 100              | 20*3 20*2<br>60*0      | 120.0               |
| 17      | 190              | 30*3 40*2<br>20*1 10*0 | 120              | 30*3 30*1<br>40*0      | 200              | 50*3 20*2<br>10*1 20*0 | 170.0               |
| 18      | 60               | 30*2 70*0              | 55               | 5*3 40*1<br>55*0       | 120              | 20*3 20*2<br>20*1 40*0 | 78.3                |
| 19      | 230              | 60*3 20*2<br>10*1 10*0 | 270              | 70*3 30*2              | 280              | 90*3 10*1              | 260.0               |
| 20      | 130              | 10*3 30*2<br>40*1 20*0 |                  |                        | 170              | 40*3 20*2<br>10*1 30*0 | 150.0               |
| 21      | 240              | 70*3 10*2<br>10*1 10*0 | 280              | 80*3 20*2              | 200              | 60*3 10*2<br>30*0      | 240.0               |
| 22      | 70               | 10*3 10*2<br>20*1 60*0 |                  |                        | 130              | 10*3 40*2<br>20*1 30*0 | 100.0               |
| 23      | 0                | 100*0                  | 0                | 100*0                  | 5                | 5*1 95*0               | 1.7                 |
| 24      | 230              | 70*3 10*2<br>20*0      |                  |                        | 220              | 60*3 20*2<br>20*0      | 225.0               |
| 25      | 240              | 60*3 20*2<br>20*1      |                  |                        | 255              | 70*3 20*2<br>5*1 5*0   | 247.5               |
| 26      | 230              | 50*3 30*2<br>20*1      | 160              | 80*2 20*0              | 180              | 40*3 20*2<br>20*1 20*0 | 190.0               |
| 27      | 0                | 100*0                  | 100              | 100*1                  | 0                | 100*0                  | 33.3                |
| 28      | 120              | 40*2 40*1<br>20*0      | 100              | 40*2 20*1<br>40*0      | 190              | 50*3 20*2<br>30*0      | 136.7               |

|    |     |                        |     |                        |     |                        |       |
|----|-----|------------------------|-----|------------------------|-----|------------------------|-------|
| 29 | 35  | 5*3 20*1<br>75*0       | 60  | 20*3 80*0              | 50  | 10*3 10*2<br>80*0      | 48.3  |
| 30 | 80  | 80*1 20*0              | 40  | 40*1 60*0              | 10  | 10*1 90*0              | 43.3  |
| 31 | 170 | 30*3 30*2<br>20*1 20*0 | 180 | 40*3 30*2<br>30*0      | 200 | 60*3 10*2<br>30*0      | 183.3 |
| 32 | 240 | 60*3 20*2<br>20*1      |     |                        | 220 | 60*3 10*2<br>20*1 10*0 | 230.0 |
| 33 | 0   | 100*0                  | 30  | 30*1 70*0              | 0   | 100*0                  | 10.0  |
| 34 | 30  | 30*1 70*0              | 40  | 20*2 80*0              | 50  | 10*3 10*2<br>80*0      | 40.0  |
| 35 | 120 | 20*3 20*2<br>20*1 40*0 |     |                        | 140 | 60*2 20*1<br>20*0      | 130.0 |
| 36 | 290 | 90*3 10*2              | 280 | 80*3 20*2              | 230 | 60*3 20*2<br>10*1 10*0 | 266.7 |
| 37 | 0   | 100*0                  |     |                        | 0   | 100*0                  | 0.0   |
| 38 | 255 | 70*3 20*2<br>5*1 5*0   | 270 | 70*3 30*2              | 270 | 80*3 10*2<br>10*1      | 265.0 |
| 39 | 90  | 10*3 20*2<br>20*1 50*0 |     |                        | 40  | 40*1 60*0              | 65.0  |
| 40 | 0   | 100*0                  |     |                        | 0   | 100*0                  | 0.0   |
| 41 | 190 | 30*3 50*2<br>20*0      | 230 | 70*3 10*2<br>20*0      | 200 | 50*3 20*2<br>10*1 20*0 | 206.7 |
| 42 | 0   | 100*0                  |     |                        | 0   | 100*0                  | 0.0   |
| 43 | 190 | 50*3 20*2<br>30*0      | 210 | 40*3 40*2<br>10*1 10*0 | 240 | 70*3 10*2<br>10*1 10*0 | 213.3 |
| 44 | 0   | 100*0                  | 5   | 5*1 95*0               | 0   | 100*0                  | 1.7   |
| 45 | 160 | 40*3 10*2<br>20*1 30*0 |     |                        | 230 | 60*3 20*2<br>10*1 10*0 | 195.0 |
| 46 | 140 | 30*3 20*2<br>10*1 40*0 | 210 | 70*3 30*0              | 170 | 50*3 20*1<br>30*0      | 173.3 |
| 47 | 140 | 30*3 20*2<br>10*1 40*0 |     |                        | 200 | 50*3 20*2<br>10*1 20*0 | 170.0 |
| 48 | 110 | 10*3 20*2<br>40*1 30*0 | 70  | 10*2 50*1<br>40*0      | 120 | 20*3 20*2<br>20*1 20*0 | 100.0 |
| 49 | 205 | 30*3 50*2<br>15*1 5*0  | 280 | 80*3 20*2              | 230 | 40*3 50*2<br>10*1      | 238.3 |
| 50 | 280 | 80*3 20*2              | 300 | 100*3                  | 260 | 70*3 20*2<br>10*1      | 280.0 |
| 51 | 190 | 40*3 30*2<br>10*2 20*0 |     |                        |     |                        | 190.0 |
| 52 | 30  | 30*1 70*0              | 0   | 100*0                  | 0   | 100*0                  | 10.0  |
| 53 | 260 | 80*3 20*1              | 300 | 100*3                  | 210 | 50*3 20*2<br>20*1 10*0 | 256.7 |
| 54 | 0   | 100*0                  | 0   | 100*0                  | 10  | 10*1 90*0              | 3.3   |
| 55 | 30  | 30*1 70*0              |     |                        | 5   | 5*1 95*0               | 17.5  |
| 56 | 220 | 50*3 20*2<br>30*1      | 290 | 90*3 10*2              | 260 | 70*3 20*2<br>10*1      | 256.7 |
| 57 | 160 | 30*3 20*2<br>30*1 20*0 |     |                        | 240 | 60*3 30*2<br>10*0      | 200.0 |
| 58 | 140 | 30*3 10*2<br>30*1 30*0 | 160 | 70*2 20*1<br>10*0      | 170 | 40*3 20*2<br>10*1 30*0 | 156.7 |
| 59 | 230 | 60*3 10*2<br>30*1      | 250 | 80*3 10*1<br>10*0      | 250 | 70*3 15*2<br>10*1 5*0  | 243.3 |
| 60 | 20  | 20*1 80*0              | 0   | 100*0                  | 10  | 10*1 90*0              | 10.0  |
| 61 | 190 | 30*3 40*2<br>20*1 10*0 | 130 | 10*3 50*2<br>40*0      | 160 | 30*3 20*2<br>30*1 20*0 | 160.0 |
| 62 | 275 | 90*3 5*1 5*0           | 250 | 80*3 10*1              | 200 | 30*3 40*2              | 241.7 |

|    |     |                        |     |                        |     |                        |       |
|----|-----|------------------------|-----|------------------------|-----|------------------------|-------|
|    |     |                        |     | 10*0                   |     | 30*1                   |       |
| 63 | 140 | 15*3 30*2<br>35*1 20*0 | 140 | 40*3 10*2<br>50*0      | 170 | 50*3 20*1<br>30*0      | 150.0 |
| 64 | 100 | 10*3 20*2<br>30*1 40*0 | 90  | 30*3 70*0              | 70  | 10*3 20*2<br>70*0      | 86.7  |
| 65 | 230 | 50*3 30*2<br>20*1      |     |                        | 235 | 60*3 20*2<br>15*1 5*0  | 232.5 |
| 66 | 210 | 40*3 30*2<br>30*1      | 250 | 50*3 50*2              | 230 | 50*3 30*2<br>20*1      | 230.0 |
| 67 | 30  | 30*1 70*0              | 0   | 100*0                  | 0   | 100*0                  | 10.0  |
| 68 | 0   | 100*0                  | 0   | 100*0                  | 0   | 100*0                  | 0.0   |
| 69 | 30  | 30*1 70*0              | 0   | 100*0                  | 20  | 20*1 80*0              | 16.7  |
| 70 | 0   | 100*0                  |     |                        | 0   | 100*0                  | 0.0   |
| 71 | 260 | 70*3 20*2<br>10*1      | 280 | 80*3 20*2              | 280 | 80*3 20*2              | 273.3 |
| 72 | 250 | 70*3 20*2<br>10*0      |     |                        | 250 | 80*3 10*1<br>10*0      | 250.0 |
| 73 | 275 | 90*3 5*1 5*0           | 260 | 70*3 20*2<br>10*1      | 300 | 100*3                  | 278.3 |
| 74 | 0   | 100*0                  | 0   | 100*0                  | 5   | 5*1 95*0               | 1.7   |
| 75 | 170 | 20*3 40*2<br>30*1 10*0 |     |                        | 200 | 60*3 20*1<br>20*0      | 185.0 |
| 76 | 180 | 40*3 20*2<br>20*1 20*0 |     |                        | 220 | 70*3 10*1<br>20*0      | 200.0 |
| 77 | 140 | 30*3 50*1<br>20*0      | 120 | 30*3 30*1<br>40*0      | 80  | 30*2 20*1<br>50*0      | 113.3 |
| 78 | 250 | 60*3 30*2<br>10*1      | 270 | 70*3 30*2              | 140 | 60*2 20*1<br>20*0      | 220.0 |
| 79 | 100 | 20*3 10*2<br>20*1 50*0 | 110 | 30*3 10*2<br>60*0      | 170 | 40*3 20*2<br>10*1 30*0 | 126.7 |
| 80 | 230 | 40*3 50*2<br>10*1      | 220 | 40*3 40*2<br>20*1      | 230 | 50*3 30*2<br>20*1      | 226.7 |
| 81 | 130 | 20*3 20*2<br>30*1 20*0 | 170 | 30*3 30*2<br>20*1 20*0 | 200 | 40*3 30*2<br>20*1 10*0 | 166.7 |
| 82 | 170 | 30*3 20*2<br>40*1 10*0 |     |                        | 140 | 60*2 20*1<br>20*0      | 155.0 |
| 83 | 33  | 1*3 15*2<br>84*0       |     |                        | 50  | 10*3 10*2<br>70*0      | 41.5  |
| 84 | 45  | 10*2 25*1<br>65*0      |     |                        | 30  | 10*2 10*1<br>80*0      | 37.5  |
| 85 | 190 | 40*3 30*2<br>10*1 20*0 | 250 | 70*3 20*2<br>10*0      | 280 | 80*3 20*2              | 240.0 |
| 86 | 170 | 40*3 50*1<br>10*0      | 130 | 30*3 20*2<br>50*0      | 130 | 30*3 20*2<br>50*0      | 143.3 |
| 87 | 40  | 5*2 30*1<br>65*0       | 10  | 5*2 95*0               | 30  | 10*2 10*1<br>80*0      | 26.7  |
| 88 | 220 | 60*3 20*2<br>20*0      | 280 | 80*3 20*2              | 210 | 60*3 10*2<br>10*1 20*0 | 236.7 |
| 89 | 60  | 5*3 10*2<br>25*1 60*0  | 45  | 15*2 15*1<br>70*0      | 90  | 10*3 20*2<br>20*1 50*0 | 65.0  |
| 90 | 160 | 40*3 10*2<br>20*1 30*0 | 210 | 70*3 30*0              | 200 | 50*3 20*2<br>10*1 20*0 | 190.0 |
| 91 | 40  | 10*2 20*1<br>70*0      |     |                        | 30  | 10*2 10*1<br>80*0      | 35.0  |
| 92 | 80  | 5*2 70*1<br>25*0       | 80  | 10*3 50*1<br>40*0      | 180 | 40*3 20*2<br>20*1 20*0 | 113.3 |
| 93 | 150 | 10*3 50*2              | 90  | 10*2 70*1              | 30  | 30*1 70*0              | 90.0  |



|           |     |                   |     |           |     |       |       |
|-----------|-----|-------------------|-----|-----------|-----|-------|-------|
|           |     | 20*1 20*0         |     | 20*0      |     |       |       |
| <b>94</b> | 270 | 80*3 10*2<br>10*1 | 290 | 90*3 10*2 | 300 | 100*3 | 286.7 |

| Patient | Vimentin IHC score 1 | Vimentin % x int.      | Vimentin IHC score 2 | Vimentin % x int. | Mean vimentin IHC score |
|---------|----------------------|------------------------|----------------------|-------------------|-------------------------|
| 1       | 0                    | 100*0                  | 0                    | 100*0             | 0                       |
| 2       | 0                    | 100*0                  | 0                    | 100x*0            | 0                       |
| 3       | 0                    | 100*0                  | 90                   | 30*3 70*0         | 45                      |
| 4       | 0                    | 100*0                  | 20                   | 20*1 80*0         | 10                      |
| 5       | 280                  | 80*3 20*2              | 300                  | 100*3             | 290                     |
| 6       | 0                    | 100*0                  | 100                  | 50*2 50*0         | 50                      |
| 7       | 0                    | 100*0                  | 0                    | 100*0             | 0                       |
| 8       | 60                   | 60*1 40*0              | 60                   | 30*2 70*0         | 60                      |
| 9       | 100                  | 100*1                  | 260                  | 80*3 20*1         | 180                     |
| 10      | 20                   | 10*2 90*0              | 0                    | 100*0             | 10                      |
| 11      |                      |                        | 250                  | 50*3 50*2         | 125                     |
| 12      | 0                    | 100*0                  | 0                    | 100*0             | 0                       |
| 13      | 75                   | 25*3 75*0              | 0                    | 100*0             | 37.5                    |
| 14      | 90                   | 10*3 10*2 40*1<br>40*0 | 20                   | 20*1 80*0         | 55                      |
| 15      | 0                    | 100*0                  | 0                    | 100*0             | 0                       |
| 16      | 0                    | 100*0                  | 0                    | 100*0             | 0                       |
| 17      | 0                    | 100*0                  | 0                    | 100*0             | 0                       |
| 18      | 0                    | 100*0                  | 0                    | 100*0             | 0                       |
| 19      | 35                   | 5*3 20*1 75*0          | 0                    | 100*0             | 17.5                    |
| 20      | 0                    | 100*0                  | 10                   | 10*2 90*0         | 5                       |
| 21      | 0                    | 100*0                  | 0                    | 100*0             | 0                       |
| 22      | 20                   | 10*2 90*0              | 30                   | 30*1 70*0         | 25                      |
| 23      | 160                  | 70*2 20*1 10*0         | 60                   | 60*1 40*0         | 110                     |
| 24      | 0                    | 100*0                  | 0                    | 100*0             | 0                       |
| 25      | 0                    | 100*0                  | 0                    | 100*0             | 0                       |
| 26      | 0                    | 100*0                  | 0                    | 100*0             | 0                       |
| 27      | 90                   | 90*1 10*0              | 100                  | 100*1             | 95                      |
| 28      | 30                   | 10*3 90*0              | 0                    | 100*0             | 15                      |
| 29      | 170                  | 80*2 10*1 10*0         | 90                   | 90*1 10*0         | 130                     |
| 30      | 0                    | 100*0                  | 0                    | 100*0             | 0                       |
| 31      | 30                   | 10*3 90*0              | 20                   | 20*1 80*0         | 25                      |
| 32      | 30                   | 10*3 90*0              | 0                    | 100*0             | 15                      |
| 33      | 190                  | 90*2 10*1              | 300                  | 100*3             | 245                     |
| 34      | 110                  | 30*3 20*1 50*0         | 120                  | 40*3 60*0         | 115                     |
| 35      | 200                  | 40*3 30*2 20*1<br>10*0 | 200                  | 100*2             | 200                     |
| 36      | 100                  | 30*2 40*1 20*0         | 200                  | 100*2             | 150                     |
| 37      | 200                  | 100*2                  | 200                  | 100*2             | 200                     |
| 38      | 0                    | 100*0                  | 0                    | 100*0             | 0                       |
| 39      |                      |                        | 0                    | 100*0             | 0                       |
| 40      | 0                    | 100*0                  | 40                   | 20*2 80*0         | 20                      |
| 41      | 0                    | 100*0                  | 0                    | 100*0             | 0                       |
| 42      | 0                    | 100*0                  | 0                    | 100*0             | 0                       |
| 43      | 30                   | 10*2 10*1 80*0         | 120                  | 60*2 40*0         | 75                      |
| 44      | 60                   | 60*1 40*0              | 190                  | 90*2 10*1         | 125                     |

|    |     |                       |     |            |      |
|----|-----|-----------------------|-----|------------|------|
| 45 | 0   | 100*0                 | 0   | 100*0      | 0    |
| 46 | 20  | 10*2 90*0             | 20  | 20*2 80*0  | 20   |
| 47 | 0   | 100*0                 | 0   | 100*0      | 0    |
| 48 | 0   | 100*0                 | 0   | 100*0      | 0    |
| 49 | 20  | 5*2 10*1 85*0         | 0   | 100*0      | 10   |
| 50 | 0   | 100*0                 | 0   | 100*0      | 0    |
| 51 |     |                       |     |            | 140  |
| 52 | 200 | 100*2                 | 300 | 100*3      | 250  |
| 53 | 200 | 100*2                 | 200 | 100*2      | 200  |
| 54 |     |                       | 0   | 100*0      | 0    |
| 55 | 0   | 100*0                 | 20  | 20*1 80*0  | 10   |
| 56 | 15  | 5*3 95*0              | 0   | 100*0      | 7.5  |
| 57 | 15  | 15*1 85*0             | 90  | 90*1 100*0 | 52.5 |
| 58 | 0   | 100*0                 | 0   | 100*0      | 0    |
| 59 | 85  | 5*3 30*2 10*1<br>65*0 | 90  | 30*3 70*0  | 87.5 |
| 60 | 30  | 10*2 10*1 80*0        | 80  | 40*2 60*0  | 55   |
| 61 |     |                       | 0   | 100*0      | 0    |
| 62 | 20  | 5*3 5*1 90*0          | 20  | 10*2 90*0  | 20   |
| 63 | 0   | 100*0                 | 0   | 100*0      | 0    |
| 64 | 0   | 100*0                 | 0   | 100*0      | 0    |
| 65 | 30  | 10*3 90*0             | 0   | 100*0      | 15   |
| 66 | 10  | 10*1 90*0             | 0   | 100*0      | 5    |
| 67 | 240 | 40*3 60*2             | 120 | 60*2 40*0  | 180  |
| 68 | 0   | 100*0                 | 0   | 100*0      | 0    |
| 69 | 10  | 10*1 90*0             | 20  | 20*1 80*0  | 15   |
| 70 |     |                       | 0   | 100*0      | 0    |
| 71 |     |                       | 0   | 100*0      | 0    |
| 72 | 0   | 100*0                 | 0   | 100*0      | 0    |
| 73 | 0   | 100*0                 | 0   | 100*0      | 0    |
| 74 | 0   | 100*0                 | 0   | 100*0      | 0    |
| 75 | 90  | 30*3 70*0             | 120 | 40*3 60*0  | 105  |
| 76 | 30  | 10*3 90*0             | 90  | 30*3 70*0  | 60   |
| 77 | 190 | 90*2 10*1             | 300 | 100*3      | 245  |
| 78 | 50  | 50*1 50*0             | 80  | 80*1 20*0  | 65   |
| 79 | 0   | 100*0                 | 40  | 20*2 80*0  | 20   |
| 80 | 0   | 100*0                 | 0   | 100*0      | 0    |
| 81 | 0   | 100*0                 | 0   | 100*0      | 0    |
| 82 | 0   | 100*0                 | 0   | 100*0      | 0    |
| 83 | 0   | 100*0                 | 0   | 100*0      | 0    |
| 84 | 30  | 10*3 90*0             | 90  | 30*3 70*0  | 60   |
| 85 | 0   | 100*0                 | 0   | 100*0      | 0    |
| 86 | 15  | 5*3 95*0              | 40  | 20*2 80*0  | 27.5 |
| 87 | 30  | 10*3 90*0             | 100 | 100*1      | 65   |
| 88 | 15  | 5*3 95*0              | 0   | 100*0      | 7.5  |
| 89 | 0   | 100*0                 | 0   | 100*0      | 0    |
| 90 | 30  | 10*3 90*0             | 45  | 15*3 85*0  | 37.5 |
| 91 | 160 | 20*3 50*2 30*0        | 270 | 90*3 10*0  | 215  |
| 92 | 0   | 100*0                 | 0   | 100*0      | 0    |
| 93 | 15  | 5*3 95*0              | 0   | 100*0      | 7.5  |
| 94 | 80  | 10*3 50*1 40*0        | 20  | 20*1 80*0  | 50   |

| Patient | Gender | Age | Age groups | Smoking status | p16      | Localisation         |
|---------|--------|-----|------------|----------------|----------|----------------------|
| 1       | male   | 58  | 50-69      | current        | negative | Oropharynx           |
| 2       | male   | 63  | 50-69      | current        | negative | Oral cavity          |
| 3       | female | 65  | 50-69      | former         | negative | Oral cavity          |
| 4       | male   | 49  | <50        | current        | n.p.     | Oral cavity          |
| 5       | male   | 68  | 50-69      | n.p.           | n.p.     | Oropharynx           |
| 6       | male   | 63  | 50-69      | current        | n.p.     | Oral cavity          |
| 7       | female | 44  | <50        | current        | n.p.     | Hypopharynx & Larynx |
| 8       | male   | 71  | >69        | current        | n.p.     | Hypopharynx & Larynx |
| 9       | male   | 63  | 50-69      | former         | negative | Oropharynx           |
| 10      | male   | 51  | 50-69      | current        | negative | Oral cavity          |
| 11      | female | 70  | >69        | current        | negative | Oropharynx           |
| 12      | male   | 46  | <50        | current        | negative | Oropharynx           |
| 13      | male   | 67  | 50-69      | never          | positive | Oropharynx           |
| 14      | male   | 72  | >69        | former         | positive | Oropharynx           |
| 15      | female | 50  | 50-69      | current        | negative | Oral cavity          |
| 16      | male   | 55  | 50-69      | current        | negative | Oropharynx           |
| 17      | male   | 77  | >69        | n.p.           | negative | Hypopharynx & Larynx |
| 18      | female | 45  | <50        | current        | negative | Oropharynx           |
| 19      | male   | 68  | 50-69      | former         | positive | Oropharynx           |
| 20      | male   | 58  | 50-69      | former         | negative | Oropharynx           |
| 21      | male   | 66  | 50-69      | current        | negative | Oropharynx           |
| 22      | male   | 58  | 50-69      | former         | positive | Oropharynx           |
| 23      | female | 47  | <50        | current        | positive | Oropharynx           |
| 24      | female | 60  | 50-69      | current        | negative | Oral cavity          |
| 25      | male   | 54  | 50-69      | current        | negative | Hypopharynx & Larynx |
| 26      | female | 68  | 50-69      | current        | negative | Oropharynx           |
| 27      | male   | 43  | <50        | current        | n.p.     | Oral cavity          |
| 28      | female | 46  | <50        | current        | positive | Oropharynx           |
| 29      | female | 68  | 50-69      | n.p.           | n.p.     | Hypopharynx & Larynx |
| 30      | male   | 42  | <50        | n.p.           | n.p.     | Oropharynx           |
| 31      | female | 77  | >69        | current        | negative | Oral cavity          |
| 32      | male   | 78  | >69        | never          | positive | Oropharynx           |
| 33      | male   | 49  | <50        | current        | negative | Oral cavity          |
| 34      | male   | 61  | 50-69      | former         | negative | Oral cavity          |
| 35      | male   | 61  | 50-69      | current        | negative | Oral cavity          |
| 36      | male   | 66  | 50-69      | former         | negative | Oropharynx           |
| 37      | male   | 70  | >69        | current        | negative | Oropharynx           |
| 38      | male   | 74  | >69        | never          | positive | Oropharynx           |
| 39      | male   | 55  | 50-69      | former         | positive | Oropharynx           |
| 40      | male   | 64  | 50-69      | n.p.           | n.p.     | Hypopharynx & Larynx |
| 41      | male   | 56  | 50-69      | current        | negative | Oral cavity          |
| 42      | male   | 52  | 50-69      | former         | negative | Oropharynx           |
| 43      | female | 54  | 50-69      | former         | negative | Oral cavity          |
| 44      | female | 78  | >69        | never          | negative | Oral cavity          |
| 45      | male   | 92  | >69        | former         | positive | Oropharynx           |
| 46      | male   | 70  | >69        | current        | negative | Oral cavity          |
| 47      | male   | 61  | 50-69      | current        | negative | Oropharynx           |
| 48      | male   | 69  | 50-69      | current        | negative | Oropharynx           |
| 49      | female | 63  | 50-69      | never          | positive | Oropharynx           |
| 50      | male   | 67  | 50-69      | n.p.           | negative | Hypopharynx & Larynx |
| 51      | male   | 71  | >69        | current        | negative | Oropharynx           |
| 52      | male   | 63  | 50-69      | current        | negative | Oral cavity          |
| 53      | male   | 54  | 50-69      | never          | positive | Oropharynx           |

|    |        |    |       |         |          |                      |
|----|--------|----|-------|---------|----------|----------------------|
| 54 | male   | 49 | <50   | never   | positive | Oropharynx           |
| 55 | male   | 50 | 50-69 | n.p.    | negative | Hypopharynx & Larynx |
| 56 | male   | 49 | <50   | former  | positive | Oropharynx           |
| 57 | male   | 78 | >69   | never   | positive | Oropharynx           |
| 58 | male   | 75 | >69   | never   | positive | Oropharynx           |
| 59 | male   | 77 | >69   | n.p.    | n.p.     | Oropharynx           |
| 60 | male   | 62 | 50-69 | current | negative | Oral cavity          |
| 61 | male   | 50 | 50-69 | n.p.    | n.p.     | Oropharynx           |
| 62 | male   | 50 | 50-69 | n.p.    | n.p.     | Oral cavity          |
| 63 | male   | 51 | 50-69 | former  | n.p.     | Hypopharynx & Larynx |
| 64 | male   | 79 | >69   | current | negative | Oral cavity          |
| 65 | male   | 69 | 50-69 | never   | positive | Oropharynx           |
| 66 | male   | 62 | 50-69 | Never   | positive | Oropharynx           |
| 67 | male   | 54 | 50-69 | current | negative | Oropharynx           |
| 68 | male   | 65 | 50-69 | Never   | positive | Oropharynx           |
| 69 | male   | 65 | 50-69 | former  | negative | Oropharynx           |
| 70 | male   | 56 | 50-69 | former  | positive | Oropharynx           |
| 71 | female | 55 | 50-69 | current | positive | Oropharynx           |
| 72 | female | 64 | 50-69 | current | negative | Hypopharynx & Larynx |
| 73 | male   | 57 | 50-69 | current | n.p.     | Hypopharynx & Larynx |
| 74 | male   | 62 | 50-69 | former  | negative | Hypopharynx & Larynx |
| 75 | female | 61 | 50-69 | current | negative | Oropharynx           |
| 76 | male   | 68 | 50-69 | former  | negative | Hypopharynx & Larynx |
| 77 | male   | 75 | >69   | former  | n.p.     | Hypopharynx & Larynx |
| 78 | male   | 68 | 50-69 | Never   | positive | Oropharynx           |
| 79 | male   | 63 | 50-69 | n.p.    | n.p.     | Oral cavity          |
| 80 | male   | 62 | 50-69 | current | negative | Oropharynx           |
| 81 | male   | 44 | <50   | former  | positive | Oropharynx           |
| 82 | male   | 74 | >69   | current | negative | Hypopharynx & Larynx |
| 83 | female | 71 | >69   | Never   | negative | Oral cavity          |
| 84 | female | 52 | 50-69 | current | negative | Oropharynx           |
| 85 | male   | 48 | <50   | former  | positive | Oropharynx           |
| 86 | male   | 49 | <50   | current | negative | Oral cavity          |
| 87 | female | 49 | <50   | current | negative | Oropharynx           |
| 88 | male   | 57 | 50-69 | former  | positive | Oropharynx           |
| 89 | male   | 64 | 50-69 | former  | n.p.     | Oral cavity          |
| 90 | male   | 53 | 50-69 | current | negative | Oropharynx           |
| 91 | male   | 61 | 50-69 | former  | positive | Oral cavity          |
| 92 | male   | 68 | 50-69 | current | positive | Oropharynx           |
| 93 | male   | 61 | 50-69 | current | positive | Oropharynx           |
| 94 | male   | 55 | 50-69 | current | positive | Oropharynx           |

| <b>Patient</b> | <b>T Stage</b> | <b>N Stage</b> |
|----------------|----------------|----------------|
| 1              | pT3            | cN0            |
| 2              | pT2            | cN0            |
| 3              | pT2            | cN0            |
| 4              | pT3            | pN0            |
| 5              | n.p.           | n.p.           |
| 6              | n.p.           | cN0            |
| 7              | pT3            | pN1            |
| 8              | pT3            | cN0            |
| 9              | pT3            | cN0            |
| 10             | pT2            | pN2a           |
| 11             | pT1            | pN0            |
| 12             | pT2            | pN0            |
| 13             | pT2            | pN2c           |
| 14             | pT2            | pN1            |
| 15             | pT3            | pN2c           |
| 16             | pT2            | pN2c           |
| 17             | pT1            | cN0            |
| 18             | pT3            | pN2b           |
| 19             | pT3            | pN1            |
| 20             | pT4a           | pN3            |
| 21             | pT2            | pN0            |
| 22             | pT3            | pN3            |
| 23             | pT3            | pN1            |
| 24             | pT1            | pN0            |
| 25             | pT4a           | pN2b           |
| 26             | pT3            | pN0            |
| 27             | pT1            | pN0            |
| 28             | pT2            | pN2b           |
| 29             | pT1            | pN0            |
| 30             | pT2            | pN2b           |
| 31             | pT2            | pN0            |
| 32             | pT3            | pN2b           |
| 33             | pT3            | pN1            |
| 34             | pT2            | pN2b           |
| 35             | pT3            | pN2c           |
| 36             | pT3            | pN2b           |
| 37             | pT2            | pN2b           |
| 38             | pT3            | pN1            |
| 39             | pT2            | pN0            |
| 40             | pT2            | pN0            |
| 41             | pT1            | pN0            |
| 42             | pT3            | pN2c           |
| 43             | pT3            | pN1            |
| 44             | pT2            | pN0            |
| 45             | pT3            | pN1            |
| 46             | pT2            | pN1            |
| 47             | pT3            | pN0            |
| 48             | pT3            | pN2b           |
| 49             | pT2            | pN1            |
| 50             | pT4b           | pN1            |
| 51             | pT3            | pN2b           |
| 52             | pT2            | pN2c           |
| 53             | pT2            | pN2c           |
| 54             | pT3            | pN0            |
| 55             | pT4a           | pN2c           |

|           |      |      |
|-----------|------|------|
| <b>56</b> | pT2  | pN2a |
| <b>57</b> | pT3  | pN2b |
| <b>58</b> | pT2  | pN2c |
| <b>59</b> | pT2  | pN2b |
| <b>60</b> | pT2  | pN0  |
| <b>61</b> | pT1  | pN2b |
| <b>62</b> | pT2  | pN2b |
| <b>63</b> | pT3  | pN2a |
| <b>64</b> | pT2  | pN0  |
| <b>65</b> | pT2  | pN2b |
| <b>66</b> | pT2  | pN2b |
| <b>67</b> | pT3  | pN2b |
| <b>68</b> | pT2  | pN2a |
| <b>69</b> | pT1  | pN2b |
| <b>70</b> | pT3  | pN2b |
| <b>71</b> | pT1  | pN2b |
| <b>72</b> | pT4a | pN2c |
| <b>73</b> | pT3  | cN0  |
| <b>74</b> | pT1  | cN0  |
| <b>75</b> | pT2  | pN0  |
| <b>76</b> | pT4a | pN1  |
| <b>77</b> | pT2  | pN1  |
| <b>78</b> | pT1  | pN1  |
| <b>79</b> | pT1  | pN0  |
| <b>80</b> | pT4a | pN1  |
| <b>81</b> | pT2  | pN2b |
| <b>82</b> | pT3  | pN0  |
| <b>83</b> | pT3  | pN0  |
| <b>84</b> | pT3  | cN0  |
| <b>85</b> | pT2  | pN2b |
| <b>86</b> | pT2  | pN0  |
| <b>87</b> | pT3  | pN2b |
| <b>88</b> | pT2  | pN0  |
| <b>89</b> | pT2  | pN0  |
| <b>90</b> | pT3  | pN3  |
| <b>91</b> | pT1  | pN1  |
| <b>92</b> | pT2  | pN1  |
| <b>93</b> | pT3  | pN2b |
| <b>94</b> | pT2  | pN2c |

**Supplementary Table 2:** IHC scores of EpEx, Sox2, and vimentin expression in HNSCC primary tumors of the Göttingen cohort (n=94). Scores have been evaluated by two experimenters and are shown separately as well as mean IHC scores. Data on gender, age, smoking behavior, p16 expression as a surrogate for HPV status, HNSCC tumor localization as well as TN status and whether chemotherapy was administered together with primary radiation are listed beneath.

| Patient | EpEx IHC score 1 | EpEx % x int. | EpEx IHC score 2 | EpEx % x int. | Mean EpEx IHC score |
|---------|------------------|---------------|------------------|---------------|---------------------|
| 1       | 0                | 100*0         | 0                | 100*0         | 0                   |
| 2       | 0                | 100*0         | 0                | 100*0         | 0                   |
| 3       | 0                | 100*0         | 0                | 100*0         | 0                   |
| 4       | 0                | 100*0         |                  |               | 0                   |
| 5       | 240              | 80*3 20*0     | 240              | 80*3 20*0     | 240                 |
| 6       | 30               | 10*3 90*0     | 60               | 20*3 80*0     | 45                  |
| 7       | 150              | 50*3 50*0     | 150              | 50*3 50*0     | 150                 |
| 8       | 150              | 50*3 50*0     | 150              | 50*3 50*0     | 150                 |
| 9       | 200              | 100*2         |                  |               | 200                 |
| 10      | 150              | 50*3 50*0     | 150              | 50*3 50*0     | 150                 |
| 11      | 300              | 100*3         |                  |               | 300                 |
| 12      | 150              | 50*3 50*0     | 150              | 50*3 50*0     | 150                 |
| 13      | 150              | 50*3 50*0     |                  |               | 150                 |
| 14      | 0                | 100*0         |                  |               | 0                   |
| 15      | 60               | 20*3 80*0     |                  |               | 60                  |
| 16      | 240              | 80*3 20*0     |                  |               | 240                 |
| 17      | 0                | 100*0         |                  |               | 0                   |
| 18      | 5                | 95*0          |                  |               | 5                   |
| 19      | 200              | 100*2         | 160              | 80*2 20*0     | 180                 |
| 20      | 300              | 100*3         | 300              | 100*3         | 300                 |
| 21      | 0                | 100*0         |                  |               | 0                   |
| 22      | 80               | 40*2 60*0     | 40               | 20*2 80*0     | 60                  |
| 23      | 60               | 30*2 70*0     | 40               | 20*2 80*0     | 50                  |
| 24      | 300              | 100*3         | 300              | 100*3         | 300                 |
| 25      | 0                | 100*0         | 0                | 100*0         | 0                   |
| 26      | 150              | 50*3 50*0     | 150              | 50*3 50*0     | 150                 |
| 27      | 120              | 40*3 60*0     | 0                | 100*0         | 60                  |
| 28      | 120              | 60*2 40*0     | 120              | 60*2 40*0     | 120                 |
| 29      | 0                | 100*0         | 0                | 100*0         | 0                   |
| 30      | 30               | 10*3 90*0     | 120              | 40*3 60*0     | 75                  |
| 31      | 90               | 30*3 70*0     | 90               | 30*3 70*0     | 90                  |
| 32      | 120              | 40*3 60*0     | 120              | 40*3 60*0     | 120                 |
| 33      | 160              | 80*2 20*0     | 160              | 80*2 20*0     | 160                 |
| 34      | 0                | 100*0         | 0                | 100*0         | 0                   |
| 35      | 300              | 100*3         | 300              | 100*3         | 300                 |
| 36      | 0                | 100*0         | 0                | 100*0         | 0                   |
| 37      | 15               | 5*3 95*0      | 15               | 5*3 95*0      | 15                  |
| 38      | 30               | 10*3 90*0     | 30               | 10*3 90*0     | 30                  |
| 39      | 0                | 100*0         |                  |               | 0                   |
| 40      |                  |               |                  |               |                     |
| 41      | 90               | 30*3 70*0     | 90               | 30*3 70*0     | 90                  |
| 42      | 90               | 30*3 70*0     |                  |               | 90                  |
| 43      | 90               | 30*3 70*0     | 90               | 30*3 70*0     | 90                  |
| 44      | 0                | 100*0         | 0                | 100*0         | 0                   |
| 45      | 0                | 100*0         | 0                | 100*0         | 0                   |
| 46      | 0                | 100*0         | 0                | 100*0         | 0                   |
| 47      |                  |               |                  |               |                     |
| 48      | 300              | 100*3         |                  |               | 300                 |
| 49      | 0                | 100*0         |                  |               | 0                   |

|    |     |           |     |           |     |
|----|-----|-----------|-----|-----------|-----|
| 50 | 0   | 100*0     | 0   | 100*0     | 0   |
| 51 | 0   | 100*0     |     |           | 0   |
| 52 | 300 | 100*3     | 300 | 100*3     | 600 |
| 53 | 0   | 100*0     | 0   | 100*0     | 0   |
| 54 | 300 | 100*3     | 300 | 100*3     | 300 |
| 55 | 0   | 100*0     | 0   | 100*0     | 0   |
| 56 | 0   | 100*0     | 60  | 20*3 80*0 | 60  |
| 57 | 30  | 10*3 90*0 |     |           | 30  |
| 58 |     |           |     |           |     |
| 59 | 240 | 80*3 20*0 | 270 | 90*3 10*0 | 255 |
| 60 | 0   | 100*0     |     |           | 0   |
| 61 |     |           |     |           |     |
| 62 | 60  | 20*3 80*0 | 60  | 20*3 80*0 | 60  |
| 63 | 0   | 100*0     | 0   | 100*0     | 0   |
| 64 | 150 | 50*3 50*0 |     |           | 150 |
| 65 | 0   | 100*0     | 0   | 100*0     | 0   |
| 66 |     |           |     |           |     |
| 67 |     |           |     |           |     |
| 68 |     |           |     |           |     |
| 69 | 0   | 100*0     |     |           | 0   |
| 70 | 300 | 100*3     | 300 | 100*3     | 300 |
| 71 | 0   | 100*0     | 0   | 100*0     | 0   |
| 72 | 60  | 20*3 80*0 | 30  | 10*3 90*0 | 45  |
| 73 | 180 | 60*3 40*0 | 180 | 60*3 40*0 | 180 |
| 74 | 0   | 100*0     | 0   | 100*0     | 0   |
| 75 | 180 | 60*3 40*0 | 180 | 60*3 40*0 | 180 |
| 76 | 0   | 100*0     | 0   | 100*0     | 0   |
| 77 | 240 | 80*3 20*0 | 240 | 80*3 20*0 | 240 |
| 78 | 0   | 100*0     | 0   | 100*0     | 0   |
| 79 | 0   | 100*0     | 0   | 100*0     | 0   |
| 80 | 15  | 5*3 95*0  |     |           | 15  |
| 81 | 0   | 100*0     | 0   | 100*0     | 0   |
| 82 | 15  | 5*3 95*0  |     |           | 15  |
| 83 | 90  | 30*3 70*0 | 90  | 30*3 70*0 | 90  |
| 84 | 0   | 100*0     | 0   | 100*0     | 0   |
| 85 | 0   | 100*0     |     |           | 0   |
| 86 | 300 | 100*3     | 300 | 100*3     | 300 |
| 87 | 300 | 100*3     | 300 | 100*3     | 300 |
| 88 | 90  | 30*3 70*0 | 90  | 30*3 70*0 | 90  |
| 89 | 300 | 100*3     | 300 | 100*3     | 300 |
| 90 | 0   | 100*0     | 0   | 100*0     | 0   |
| 91 | 0   | 100*0     | 0   | 100*0     | 0   |
| 92 | 0   | 100*0     | 0   | 100*0     | 0   |
| 93 | 0   | 100*0     | 0   | 100*0     | 0   |
| 94 | 0   | 100*0     | 0   | 100*0     | 0   |

| Patient | Sox2 IHC score 1 | Sox2 % x int. | Sox2 IHC score 2 | Sox2 % x int. | Mean Sox2 IHC score |
|---------|------------------|---------------|------------------|---------------|---------------------|
| 1       | 0                | 100*0         | 0                | 100*0         | 0                   |
| 2       | 0                | 100*0         | 50               | 50*1 50*0     | 25                  |
| 3       | 100              | 50*2 50*0     | 100              | 50*2 50*0     | 100                 |
| 4       | 0                | 100*0         | 300              | 100*3         | 150                 |
| 5       |                  |               | 300              | 100*3         | 300                 |



|    |     |                     |     |                |      |
|----|-----|---------------------|-----|----------------|------|
| 6  |     |                     | 10  | 10*1 90*0      | 10   |
| 7  | 200 | 100*2               | 300 | 100*3          | 250  |
| 8  | 0   |                     | 0   |                | 0    |
| 9  | 100 | 50*2 50*0           | 100 | 50*2 50*0      | 100  |
| 10 | 300 | 100*3               | 300 | 100*3          | 300  |
| 11 |     |                     | 300 | 100*3          | 300  |
| 12 | 250 | 50*3 50*2           | 0   | 100*0          | 125  |
| 13 | 130 | 20*3 30*2 10*1 40*0 |     |                | 130  |
| 14 | 10  | 10*1 90*0           | 30  | 10*2 10*1 80*0 | 20   |
| 15 | 300 | 100*3               |     |                | 300  |
| 16 | 40  | 10*2 20*1 70*0      | 0   |                | 20   |
| 17 | 0   | 100*0               |     |                | 0    |
| 18 | 0   |                     | 0   |                | 0    |
| 19 | 160 | 80*2 20*0           | 140 | 70*2 30*0      | 150  |
| 20 | 300 | 100*3               | 300 | 100*3          | 300  |
| 21 |     |                     |     |                |      |
| 22 | 170 | 30*3 40*2 30*0      | 200 | 100*2          | 185  |
| 23 | 250 | 50*3 50*2           | 250 | 50*3 50*2      | 250  |
| 24 |     |                     | 40  | 20*2 80*0      | 40   |
| 25 | 300 | 100*3               | 300 | 100*3          | 300  |
| 26 | 200 | 100*2               | 200 | 100*2          | 200  |
| 27 | 0   | 100*0               | 0   | 100*0          | 0    |
| 28 | 20  | 20*1 80*0           | 20  | 20*1 80*0      | 20   |
| 29 | 300 | 100*3               |     |                | 300  |
| 30 | 160 | 80*2 20*0           | 40  | 20*2 80*0      | 100  |
| 31 | 0   | 100*0               | 0   | 100*0          | 0    |
| 32 | 200 | 100*2               | 200 | 100*2          | 200  |
| 33 | 300 | 100*3               | 300 | 100*3          | 300  |
| 34 | 0   | 100*0               | 0   | 100*0          | 0    |
| 35 | 300 | 100*3               | 300 | 100*3          | 300  |
| 36 | 40  | 20*2 80*0           | 100 | 50*2 50*0      | 70   |
| 37 | 80  | 40*2 60*0           | 80  | 40*2 60*0      | 80   |
| 38 | 300 | 100*3               | 150 | 50*2 50*1      | 225  |
| 39 | 120 | 60*2 40*0           | 0   |                | 60   |
| 40 | 210 | 70*3 30*0           | 110 | 30*3 20*1 50*0 | 160  |
| 41 | 0   | 100*0               | 0   | 100*0          | 0    |
| 42 | 10  | 10*1 90*0           | 15  | 5*2 5*1 90*0   | 12.5 |
| 43 | 300 | 100*3               | 300 | 100*3          | 300  |
| 44 | 0   | 100*0               | 0   | 100*0          | 0    |
| 45 | 300 | 100*3               | 300 | 100*3          | 300  |
| 46 | 190 | 50*3 20*2 30*0      | 160 | 80*2 20*0      | 175  |
| 47 |     |                     | 0   | 100*0          | 0    |
| 48 | 20  | 10*2 90*0           | 20  | 10*2 90*0      | 20   |
| 49 |     |                     |     |                |      |
| 50 | 200 | 100*2               | 100 | 50*2 50*0      | 150  |
| 51 | 40  | 20*2 80*0           | 40  | 20*2 80*0      | 40   |
| 52 | 300 | 100*3               | 300 | 100*3          | 300  |
| 53 | 80  | 30*2 20*1 50*0      | 80  | 30*2 20*1 50*0 | 80   |
| 54 | 120 | 60*2 40*0           | 40  | 20*2 80*0      | 80   |
| 55 | 20  | 20*1 80*0           | 20  | 20*1 80*0      | 20   |
| 56 | 0   | 100*0               | 250 | 50*3 50*2      | 125  |
| 57 | 160 | 60*2 40*1           |     |                | 160  |
| 58 | 0   | 100*0               | 0   | 100*0          | 0    |
| 59 | 0   | 100*0               | 0   | 100*0          | 0    |
| 60 |     |                     | 0   | 100*0          | 0    |
| 61 | 0   | 100*0               |     |                | 0    |

|    |     |                |     |                |      |
|----|-----|----------------|-----|----------------|------|
| 62 | 300 | 100*3          | 300 | 100*3          | 300  |
| 63 | 0   | 100*0          | 40  | 20*2 80*0      | 20   |
| 64 | 120 | 20*2 80*1      |     |                | 120  |
| 65 | 100 | 20*3 20*2 60*0 |     |                | 100  |
| 66 | 0   | 100*0          | 0   | 100*0          | 0    |
| 67 | 0   | 100*0          |     |                | 0    |
| 68 | 300 | 100*3          | 300 | 100*3          | 300  |
| 69 |     |                | 0   | 100*0          | 0    |
| 70 | 200 | 100*2          | 200 | 100*2          | 200  |
| 71 | 0   | 100*0          | 60  | 30*2 70*0      | 30   |
| 72 | 300 | 100*3          | 300 | 100*3          | 300  |
| 73 | 210 | 50*3 30*2 20*0 | 280 | 80*3 20*2      | 245  |
| 74 | 200 | 100*2          | 200 | 100*2          | 200  |
| 75 | 0   | 100*0          | 0   | 100*0          | 0    |
| 76 | 40  | 20*2 80*0      | 0   | 100*0          | 20   |
| 77 | 200 | 100*2          | 200 | 100*2          | 200  |
| 78 | 0   | 100*0          | 10  | 10*1 90*0      | 5    |
| 79 | 0   | 100*0          | 0   | 100*0          | 0    |
| 80 | 30  | 10*2 10*1 80*0 |     |                | 30   |
| 81 | 0   | 100*0          | 0   | 100*0          | 0    |
| 82 | 0   | 100*0          | 10  | 10*1 90*0      | 5    |
| 83 | 25  | 5*3 5*2 90*0   | 0   | 100*0          | 12.5 |
| 84 | 300 | 100*3          | 300 | 100*3          | 300  |
| 85 |     |                | 180 | 80*2 20*1      | 180  |
| 86 | 300 | 100*3          | 300 | 100*3          | 300  |
| 87 | 180 | 80*2 20*1      | 180 | 80*2 20*1      | 180  |
| 88 | 0   | 100*0          | 70  | 20*2 30*1 50*0 | 35   |
| 89 | 0   | 100*0          | 200 | 100*2          | 100  |
| 90 | 30  | 10*2 10*1 80*0 | 30  | 10*2 10*1 80*0 | 30   |
| 91 | 0   | 100*0          | 0   | 100*0          | 0    |
| 92 |     |                | 0   | 100*0          | 0    |
| 93 | 0   | 100*0          | 0   | 100*0          | 0    |
| 94 | 0   | 100*0          | 0   | 100*0          | 0    |

| Patient | Vimentin IHC score 1 | Vimentin % x int. | Vimentin ICH score 2 | Vimentin % x int. | Mean Vimentin score |
|---------|----------------------|-------------------|----------------------|-------------------|---------------------|
| 1       | 0                    | 100*0             | 0                    | 100*0             | 0                   |
| 2       | 0                    | 100*0             | 0                    | 100*0             | 0                   |
| 3       | 60                   | 20*3 80*0         | 60                   | 20*3 80*0         | 60                  |
| 4       | 0                    | 100*0             | 0                    | 100*0             | 0                   |
| 5       | 0                    | 100*0             | 0                    | 100*0             | 0                   |
| 6       |                      |                   | 0                    | 100*0             | 0                   |
| 7       | 0                    | 100*0             | 0                    | 100*0             | 0                   |
| 8       | 0                    | 100*0             |                      |                   | 0                   |
| 9       |                      |                   | 60                   | 20*3 80*0         | 60                  |
| 10      | 0                    | 100*0             | 0                    | 100*0             | 0                   |
| 11      |                      |                   | 0                    | 100*0             | 0                   |
| 12      | 0                    | 100*0             | 0                    | 100*0             | 0                   |
| 13      | 240                  | 80*3 20*0         |                      |                   | 240                 |
| 14      |                      |                   | 0                    | 100*0             | 0                   |
| 15      | 0                    | 100*0             |                      |                   | 0                   |
| 16      | 0                    | 100*0             |                      |                   | 0                   |

|    |     |           |     |           |     |
|----|-----|-----------|-----|-----------|-----|
| 17 | 0   | 100*0     | 0   | 100*0     | 0   |
| 18 | 0   | 100*0     |     |           | 0   |
| 19 | 60  | 20*3 80*0 | 60  | 20*3 80*0 | 60  |
| 20 | 300 | 100*3     | 300 | 100*3     | 300 |
| 21 | 300 | 100*3     |     |           | 300 |
| 22 | 0   | 100*0     | 0   | 100*0     | 0   |
| 23 | 0   | 100*0     | 0   | 100*0     | 0   |
| 24 | 0   | 100*0     | 0   | 100*0     | 0   |
| 25 | 60  | 20*3 80*0 | 60  | 20*3 80*0 | 60  |
| 26 | 60  | 20*3 80*0 | 210 | 70*3 30*0 | 135 |
| 27 | 0   | 100*0     |     |           | 0   |
| 28 | 60  | 20*3 80*0 | 60  | 20*3 80*0 | 60  |
| 29 |     |           |     |           |     |
| 30 | 0   | 100*0     | 60  | 20*3 80*0 | 30  |
| 31 | 0   | 100*0     | 0   | 100*0     | 0   |
| 32 | 0   | 100*0     | 0   | 100*0     | 0   |
| 33 | 0   | 100*0     | 0   | 100*0     | 0   |
| 34 | 150 | 50*3 50*0 | 150 | 50*3 50*0 | 150 |
| 35 | 0   | 100*0     | 0   | 100*0     | 0   |
| 36 |     |           | 0   | 100*0     | 0   |
| 37 | 300 | 100*3     | 300 | 100*3     | 300 |
| 38 | 0   | 100*0     | 0   | 100*0     | 0   |
| 39 |     |           |     |           |     |
| 40 | 0   | 100*0     | 0   | 100*0     | 0   |
| 41 | 0   | 100*0     | 0   | 100*0     | 0   |
| 42 | 0   | 100*0     | 0   | 100*0     | 0   |
| 43 | 0   | 100*0     | 0   | 100*0     | 0   |
| 44 | 240 | 80*3 20*0 | 240 | 80*3 20*0 | 240 |
| 45 |     |           | 0   | 100*0     | 0   |
| 46 | 150 | 50*3 50*0 | 150 | 50*3 50*0 | 150 |
| 47 |     |           |     |           |     |
| 48 | 0   | 100*0     | 0   | 100*0     | 0   |
| 49 |     |           |     |           |     |
| 50 | 0   | 100*0     | 0   | 100*0     | 0   |
| 51 |     |           |     |           |     |
| 52 | 0   | 100*0     |     |           | 0   |
| 53 | 90  | 30*3 70*0 | 150 | 50*3 50*0 | 120 |
| 54 | 240 | 80*3 20*0 | 240 | 80*3 20*0 | 240 |
| 55 | 0   | 100*0     | 0   | 100*0     | 0   |
| 56 | 0   | 100*0     | 0   | 100*0     | 0   |
| 57 | 0   | 100*0     | 0   | 100*0     | 0   |
| 58 |     |           |     |           |     |
| 59 | 240 | 80*3 20*0 | 240 | 80*3 20*0 | 240 |
| 60 |     |           |     |           |     |
| 61 |     |           |     |           |     |
| 62 | 0   | 100*0     | 0   | 100*0     | 0   |
| 63 | 60  | 20*3 80*0 | 60  | 20*3 80*0 | 60  |
| 64 | 0   | 100*0     |     |           | 0   |
| 65 |     |           | 0   | 100*0     | 0   |
| 66 |     |           |     |           |     |
| 67 |     |           |     |           |     |
| 68 | 0   | 100*0     | 0   | 100*0     | 0   |
| 69 | 0   | 100*0     |     |           | 0   |
| 70 | 0   | 100*0     | 0   | 100*0     | 0   |
| 71 | 90  | 30*3 70*0 | 90  | 30*3 70*0 | 90  |
| 72 | 150 | 50*3 50*0 | 60  | 20*3 80*0 | 105 |

|    |     |           |     |           |     |
|----|-----|-----------|-----|-----------|-----|
| 73 | 0   | 100*0     | 0   | 100*0     | 0   |
| 74 | 0   | 100*0     | 0   | 100*0     | 0   |
| 75 | 0   | 100*0     | 0   | 100*0     | 0   |
| 76 | 0   | 100*0     | 0   | 100*0     | 0   |
| 77 |     |           |     |           |     |
| 78 |     |           | 0   | 100*0     | 0   |
| 79 | 0   | 100*0     | 0   | 100*0     | 0   |
| 80 | 150 | 50*3 50*0 |     |           | 150 |
| 81 | 0   | 100*0     | 0   | 100*0     | 0   |
| 82 | 0   | 100*0     |     |           | 0   |
| 83 | 0   | 100*0     | 0   | 100*0     | 0   |
| 84 | 0   | 100*0     | 0   | 100*0     | 0   |
| 85 | 0   | 100*0     |     |           | 0   |
| 86 | 0   | 100*0     | 0   | 100*0     | 0   |
| 87 | 0   | 100*0     | 0   | 100*0     | 0   |
| 88 | 240 | 80*3 20*0 | 240 | 80*3 20*0 | 240 |
| 89 |     |           | 0   | 100*0     | 0   |
| 90 | 0   | 100*0     | 0   | 100*0     | 0   |
| 91 | 0   | 100*0     | 0   | 100*0     | 0   |
| 92 | 0   | 100*0     | 0   | 100*0     | 0   |
| 93 | 0   | 100*0     | 0   | 100*0     | 0   |
| 94 |     |           | 300 | 100*3     | 300 |

| <b>Patient</b> | <b>Gender</b> | <b>Age</b> | <b>Age groups</b> | <b>Smoking status</b> | <b>p16</b> | <b>Localisation</b>  |
|----------------|---------------|------------|-------------------|-----------------------|------------|----------------------|
| 1              | male          | 53.74      | 50-69             | ever                  | positive   | Hypopharynx & Larynx |
| 2              | male          | 54.83      | 50-69             | ever                  | positive   | Oral cavity          |
| 3              | female        | 55.77      | 50-69             | ever                  | negative   | Oropharynx           |
| 4              | male          | 77.54      | >69               | never                 | negative   | Hypopharynx & Larynx |
| 5              | male          | 69.65      | 50-69             | ever                  | positive   | Oropharynx           |
| 6              | male          | 46.21      | <50               | never                 | positive   | Oral cavity          |
| 7              | female        | 60.12      | 50-69             | ever                  | negative   | Oropharynx           |
| 8              | male          | 70.67      | >69               | ever                  | positive   | Oral cavity          |
| 9              | male          | 66.67      | 50-69             | ever                  | negative   | Oropharynx           |
| 10             | male          | 82.40      | >69               | ever                  | positive   | Oral cavity          |
| 11             | male          | 52.56      | 50-69             | never                 | negative   | Oropharynx           |
| 12             | male          | 51.04      | 50-69             | ever                  | positive   | Oropharynx           |
| 13             | male          | 56.00      | 50-69             | ever                  | positive   | Oropharynx           |
| 14             | male          | 58.78      | 50-69             | ever                  | positive   | Hypopharynx & Larynx |
| 15             | male          | 64.12      | 50-69             | ever                  | negative   | Oropharynx           |
| 16             | male          | 68.62      | 50-69             | ever                  | positive   | Oral cavity          |
| 17             | male          | 78.93      | >69               | never                 | negative   | Oropharynx           |
| 18             | female        | 81.33      | >69               | never                 | negative   | Oral cavity          |
| 19             | male          | 58.82      | 50-69             | ever                  | positive   | Hypopharynx & Larynx |
| 20             | male          | 68.88      | 50-69             | never                 | positive   | Oropharynx           |
| 21             | male          | 63.19      | 50-69             | ever                  | positive   | Oropharynx           |
| 22             | male          | 55.72      | 50-69             | never                 | negative   | Hypopharynx & Larynx |
| 23             | male          | 62.90      | 50-69             | never                 | positive   | Oral cavity          |
| 24             | male          | 63.78      | 50-69             | ever                  | positive   | Hypopharynx & Larynx |
| 25             | male          | 65.43      | 50-69             | never                 | positive   | Oropharynx           |
| 26             | male          | 52.31      | 50-69             | ever                  | positive   | Oropharynx           |
| 27             | male          | 55.98      | 50-69             | ever                  | negative   | Hypopharynx & Larynx |
| 28             | male          | 59.92      | 50-69             | ever                  | negative   | Oropharynx           |
| 29             | male          | 47.94      | <50               | ever                  | positive   | Oropharynx           |
| 30             | male          | 53.68      | 50-69             | ever                  | positive   | Hypopharynx & Larynx |
| 31             | male          | 46.00      | <50               | ever                  | positive   | Oropharynx           |
| 32             | male          | 60.18      | 50-69             | ever                  | positive   | Hypopharynx & Larynx |
| 33             | male          | 49.86      | <50               | ever                  | positive   | Oropharynx           |
| 34             | male          | 62.39      | 50-69             | ever                  | negative   | Oral cavity          |
| 35             | male          | 56.58      | 50-69             | ever                  | negative   | Oropharynx           |
| 36             | male          | 60.85      | 50-69             | ever                  | negative   | Hypopharynx & Larynx |
| 37             | male          | 68.59      | 50-69             | ever                  | positive   | Oral cavity          |
| 38             | male          | 57.89      | 50-69             | ever                  | negative   | Hypopharynx & Larynx |
| 39             | male          | 48.00      | <50               | ever                  | negative   | Oral cavity          |
| 40             | male          | 55.32      | 50-69             | ever                  | positive   | Hypopharynx & Larynx |
| 41             | male          | 58.20      | 50-69             | ever                  | negative   | Oropharynx           |
| 42             | male          | 45.88      | <50               | never                 | negative   | Oropharynx           |
| 43             | female        | 55.41      | 50-69             | ever                  | positive   | Oral cavity          |
| 44             | male          | 65.62      | 50-69             | ever                  | negative   | Hypopharynx & Larynx |
| 45             | male          | 40.50      | <50               | ever                  | negative   | Oropharynx           |
| 46             | male          | 50.05      | 50-69             | ever                  | positive   | Oropharynx           |
| 47             | female        | 43.79      | <50               | never                 | negative   | Oral cavity          |
| 48             | male          | 65.47      | 50-69             | ever                  | negative   | Oral cavity          |
| 49             | male          | 84.24      | >69               | ever                  | positive   | Oropharynx           |
| 50             | male          | 65.01      | 50-69             | ever                  | positive   | Oral cavity          |
| 51             | female        | 41.96      | <50               | ever                  | negative   | Oral cavity          |
| 52             | male          | 53.45      | 50-69             | ever                  | negative   | Oropharynx           |
| 53             | female        | 70.71      | >69               | ever                  | positive   | Oropharynx           |
| 54             | male          | 44.39      | <50               | ever                  | negative   | Oral cavity          |

|    |        |       |       |       |          |                      |
|----|--------|-------|-------|-------|----------|----------------------|
| 55 | male   | 50.19 | 50-69 | ever  | negative | Oral cavity          |
| 56 | male   | 63.16 | 50-69 | never | negative | Hypopharynx & Larynx |
| 57 | male   | 61.19 | 50-69 | never | negative | Hypopharynx & Larynx |
| 58 | male   | 50.96 | 50-69 | ever  | positive | Hypopharynx & Larynx |
| 59 | male   | 52.59 | 50-69 | never | negative | Hypopharynx & Larynx |
| 60 | male   | 67.17 | 50-69 | ever  | negative | Oropharynx           |
| 61 | male   | 64.79 | 50-69 | ever  | negative | Oropharynx           |
| 62 | male   | 59.25 | 50-69 | ever  | positive | Hypopharynx & Larynx |
| 63 | male   | 57.59 | 50-69 | ever  | negative | Hypopharynx & Larynx |
| 64 | male   | 44.02 | <50   | ever  | positive | Oropharynx           |
| 65 | male   | 56.64 | 50-69 | ever  | positive | Oropharynx           |
| 66 | male   | 48.05 | <50   | ever  | negative | Hypopharynx & Larynx |
| 67 | male   | 60.52 | 50-69 | ever  | positive | Oral cavity          |
| 68 | male   | 51.92 | 50-69 | ever  | negative | Oropharynx           |
| 69 | female | 20.68 | <50   | ever  | negative | Oral cavity          |
| 70 | male   | 49.64 | <50   | ever  | positive | Hypopharynx & Larynx |
| 71 | male   | 48.93 | <50   | ever  | negative | Oral cavity          |
| 72 | male   | 52.84 | 50-69 | ever  | negative | Oropharynx           |
| 73 | male   | 57.06 | 50-69 | ever  | positive | Hypopharynx & Larynx |
| 74 | female | 54.80 | 50-69 | ever  | negative | Oral cavity          |
| 75 | male   | 49.80 | <50   | ever  | negative | Oropharynx           |
| 76 | male   | 61.99 | 50-69 | ever  | negative | Hypopharynx & Larynx |
| 77 | female | 55.00 | 50-69 | ever  | negative | Hypopharynx & Larynx |
| 78 | female | 82.06 | >69   | ever  | positive | Oral cavity          |
| 79 | female | 88.77 | >69   | never | positive | Oral cavity          |
| 80 | male   | 53.66 | 50-69 | ever  | negative | Oral cavity          |
| 81 | male   | 70.99 | >69   | ever  | positive | Oral cavity          |
| 82 | male   | 45.08 | <50   | ever  | negative | Oral cavity          |
| 83 | female | 64.60 | 50-69 | never | positive | Oropharynx           |
| 84 | female | 49.45 | <50   | ever  | positive | Oropharynx           |
| 85 | male   | 53.90 | 50-69 | ever  | negative | Oropharynx           |
| 86 | male   | 48.92 | <50   | ever  | positive | Oropharynx           |
| 87 | female | 70.72 | >69   | never | positive | Hypopharynx & Larynx |
| 88 | female | 66.27 | 50-69 | ever  | negative | Oral cavity          |
| 89 | male   | 56.14 | 50-69 | ever  | negative | Oropharynx           |
| 90 | male   | 63.82 | 50-69 | never | negative | Oral cavity          |
| 91 | male   | 45.37 | <50   | ever  | negative | Oral cavity          |
| 92 | male   | 54.88 | 50-69 | ever  | positive | Oropharynx           |
| 93 | male   | 69.71 | 50-69 | ever  | positive | Oral cavity          |
| 94 | male   | 69.22 | 50-69 | ever  | negative | Hypopharynx & Larynx |

| <b>Patient</b> | <b>T Stage</b> | <b>N Stage</b> | <b>Chemotherapy</b> |
|----------------|----------------|----------------|---------------------|
| 1              | pT2            | pN2c           | yes                 |
| 2              | pT4a/b         | pN2a           | yes                 |
| 3              | pT4a/b         | pN0            | no                  |
| 4              | pT4a/b         | pN2b           | no                  |
| 5              | pT4a/b         | pN2b           | no                  |
| 6              | pT4a/b         | pN2b           | yes                 |
| 7              | pT2            | pN2c           | yes                 |
| 8              | pT2            | pN0            | no                  |
| 9              | pT3            | pN2b           | yes                 |
| 10             | pT4a/b         | pN2a           | yes                 |
| 11             | pT4a/b         | pN1            | no                  |
| 12             | pT4a/b         | pN2c           | yes                 |
| 13             | pT4a/b         | pN0            | no                  |
| 14             | pT4a/b         | pN0            | yes                 |
| 15             | pT4a/b         | pN2b           | yes                 |
| 16             | pT4a/b         | pN2b           | yes                 |
| 17             | pT4a/b         | pN2c           | no                  |
| 18             | pT4a/b         | pN2c           | no                  |
| 19             | pT4a/b         | pN3            | no                  |
| 20             | pT4a/b         | pN2b           | yes                 |
| 21             | pT4a/b         | pN2c           | yes                 |
| 22             | pT4a/b         | pN2c           | yes                 |
| 23             | pT2            | pN0            | yes                 |
| 24             | pT4a/b         | pN2b           | yes                 |
| 25             | pT1            | pN3            | yes                 |
| 26             | pT4a/b         | pN2c           | yes                 |
| 27             | pT4a/b         | pN2c           | yes                 |
| 28             | pT4a/b         | pN2c           | yes                 |
| 29             | pT4a/b         | pN3            | yes                 |
| 30             | pT4a/b         | pN2c           | yes                 |
| 31             | pT4a/b         | pN2a           | yes                 |
| 32             | pT4a/b         | pN2c           | yes                 |
| 33             | pT4a/b         | pN2b           | no                  |
| 34             | pT4a/b         | pN2a           | yes                 |
| 35             | pT4a/b         | pN2c           | yes                 |
| 36             | pT1            | pN2b           | yes                 |
| 37             | pT2            | pN0            | yes                 |
| 38             | pT4a/b         | pN2c           | yes                 |
| 39             | pT4a/b         | pN0            | yes                 |
| 40             | pT4a/b         | pN2a           | yes                 |
| 41             | pT4a/b         | pN2c           | yes                 |
| 42             | pT4a/b         | pN1            | no                  |
| 43             | pT3            | pN2a           | yes                 |
| 44             | pT4a/b         | pN0            | yes                 |
| 45             | pT4a/b         | pN2c           | yes                 |
| 46             | pT4a/b         | pN2b           | yes                 |
| 47             | pT4a/b         | pN0            | yes                 |
| 48             | pT4a/b         | pN2a           | yes                 |
| 49             | pT4a/b         | pN2b           | yes                 |
| 50             | pT2            | pN0            | yes                 |
| 51             | pT4a/b         | pN2b           | yes                 |
| 52             | pT3            | pN2c           | yes                 |
| 53             | pT4a/b         | pN2c           | yes                 |
| 54             | pT4a/b         | pN1            | yes                 |
| 55             | pT4a/b         | pN2c           | yes                 |

|    |        |      |     |
|----|--------|------|-----|
| 56 | pT3    | pN2b | yes |
| 57 | pT4a/b | pN3  | yes |
| 58 | pT4a/b | pN2c | yes |
| 59 | pT4a/b | pN2a | yes |
| 60 | pT2    | pN1  | yes |
| 61 | pT4a/b | pN3  | yes |
| 62 | pT3    | pN2c | yes |
| 63 | pT4a/b | pN2c | no  |
| 64 | pT4a/b | pN2c | no  |
| 65 | pT4a/b | pN0  | yes |
| 66 | pT4a/b | pN3  | yes |
| 67 | pT3    | pN1  | yes |
| 68 | pT4a/b | pN2c | no  |
| 69 | pT1    | pN2a | yes |
| 70 | pT3    | pN2b | yes |
| 71 | pT4a/b | pN2c | yes |
| 72 | pT1    | pN1  | yes |
| 73 | pT4a/b | pN2c | no  |
| 74 | pT3    | pN0  | yes |
| 75 | pT4a/b | pN2b | yes |
| 76 | pT3    | pN0  | yes |
| 77 | pT4a/b | pN2b | yes |
| 78 | pT3    | pN2c | no  |
| 79 | pT4a/b | pN2a | no  |
| 80 | pT4a/b | pN2b | yes |
| 81 | pT3    | pN0  | no  |
| 82 | pT4a/b | pN2c | yes |
| 83 | pT4a/b | pN1  | yes |
| 84 | pT4a/b | pN2b | yes |
| 85 | pT4a/b | pN2a | no  |
| 86 | pT4a/b | pN1  | yes |
| 87 | pT4a/b | pN2c | yes |
| 88 | pT4a/b | pN2c | yes |
| 89 | pT4a/b | pN2a | yes |
| 90 | pT3    | pN1  | yes |
| 91 | pT4a/b | pN1  | yes |
| 92 | pT4a/b | pN2c | yes |
| 93 | pT3    | pN0  | yes |
| 94 | pT2    | pN0  | yes |
